# Supplementary material
Source: publisher figshare collection journal article supplement (https://acs.figshare.com/ndownloader/files/4485568)
Supplement: Supplementary file 1 [file 4485568]

Supporting Information for

# "Asymmetric Secondary and Tertiary Streptavidin/DNA Complexes Selectively Formed in a Nanometer-scale DNA Well"

Kentaro Numajiri, Akinori Kuzuya,\* and Makoto Komiyama\*

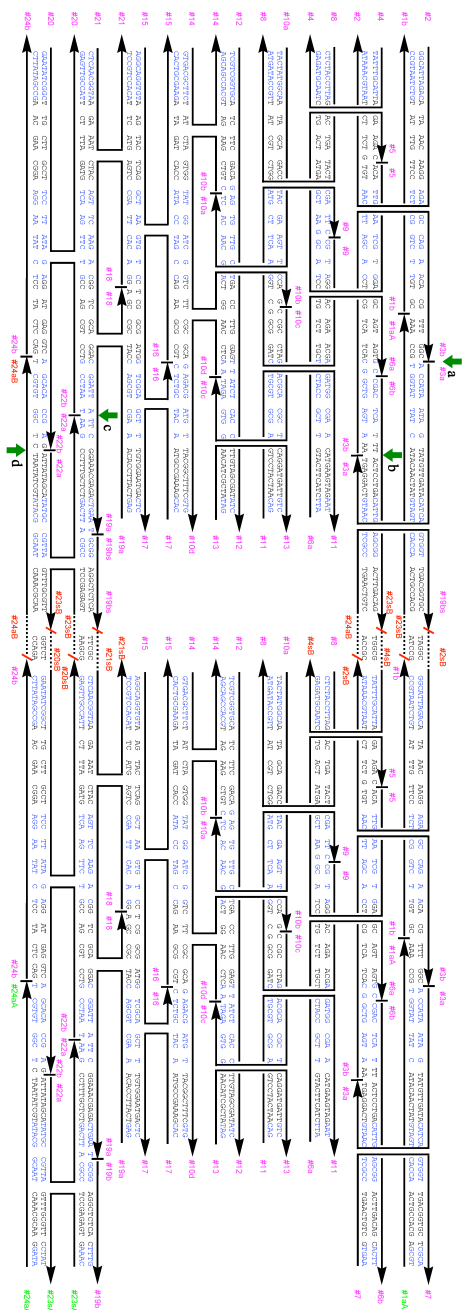

**Figure S1.** Detailed sequence of the strands making up the DNA motifs (2a, 2b). For constructing 3 or 4, the nucleotides listed in Table S1 were inserted in the points indicated by the green arrows.

**Table S1.** Inserted nucleotides in the motifs.

|          | <b>3</b>          | <b>4</b>                     |
|----------|-------------------|------------------------------|
| <b>a</b> | 5' -TAGCGAGTGA-3' | 5' -TGGACTTTAGGTAGCGAGTGA-3' |
|          | 3' -ATCGCTCACT-5' | 3' -ACCTGAAATCCATCGCTCACT-5' |
| <b>b</b> | 5' -TGATTACTGT-3' | 5' -CACTCTTCAATGATTACTGT-3'  |
|          | 3' -ACTAATGACA-5' | 3' -GTGAGAAAGTTACTAATGACA-5' |
| <b>c</b> | 5' -CGGTACACTA-3' | 5' -CAGTTGTATTGCGGTACACTA-3' |
|          | 3' -GCCATGTGAT-5' | 3' -GTCAACATAACGCCATGTGAT-5' |
| <b>d</b> | 5' -ACAACTCTCC-3' | 5' -CTAAACTCGTAACAACTCTCC-3' |
|          | 3' -TGTTGAGAGG-5' | 3' -GATTTGAGCATTGTTGAGAGG-5' |

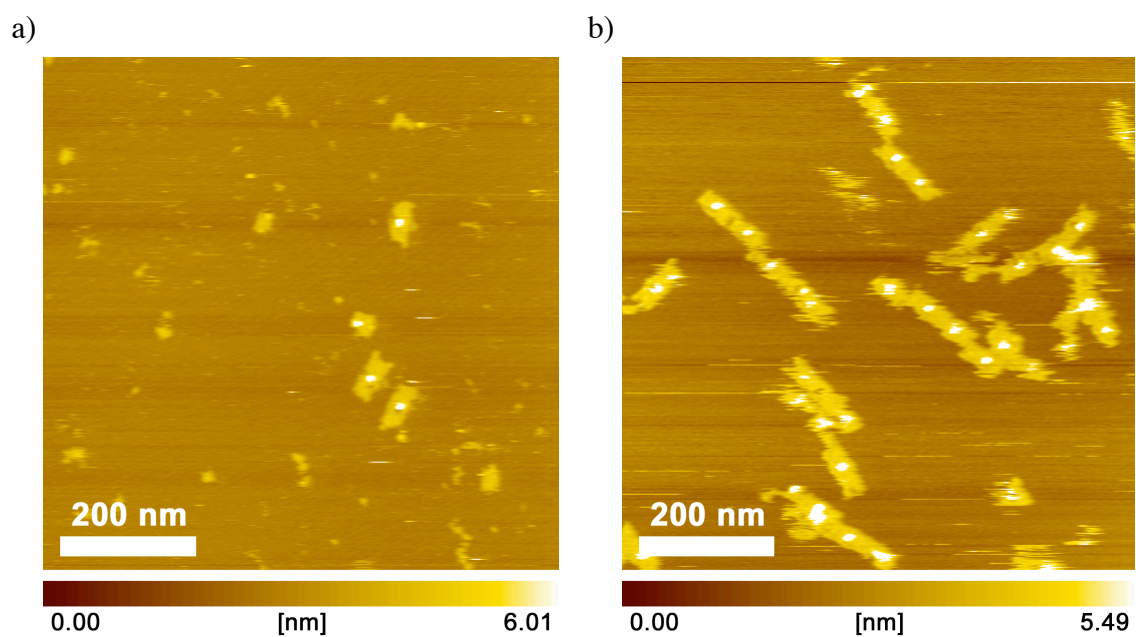

**Figure S2.** AFM images of (a) SA/2a complexes and (b) SA/2b complexes.

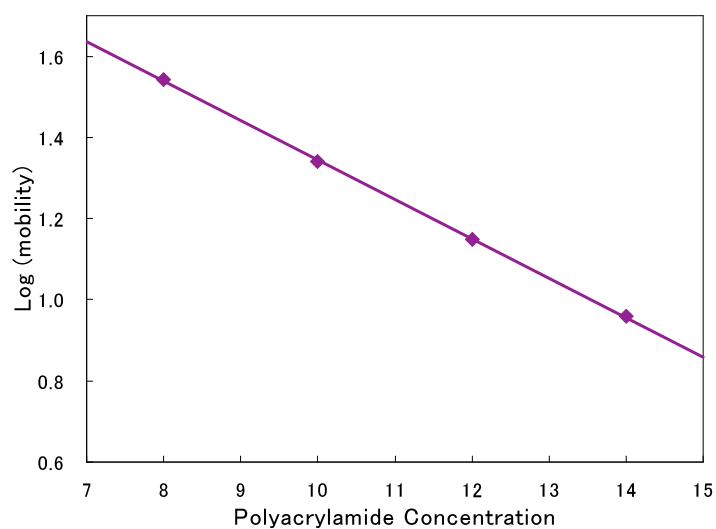

**Figure S3.** The Ferguson plot of the lower band in Figure 4a. The slope is -0.097 and the intercept is 2.32.

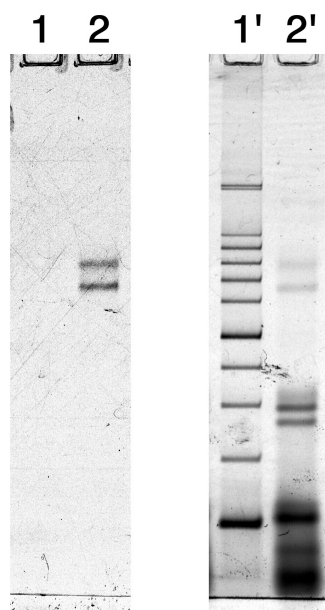

**Figure S4.** Quantification of the complexes with FAM-labeling. (a) A 12% denaturing PAGE analysis of SA captured in **2a** containing FAM-labeled **14bio**. Lanes 1 and 2 was imaged by the fluorescence of FAM and lanes 1' and 2' was stained with GelStar afterward. Lane 1 and 1', 100-bp dsDNA ladder; lanes 2 and 2', **2a** containing FAM-labeled **14bio** was mixed with SA. Conditions: [SA] = 1.1  $\mu$ M, [DNA motifs] = 14 nM. Quantified intensities of FAM fluorescence were normalized by expected number of FAM in the complex. The yield of the secondary SA/DNA complex (the lower band) in lane 2 calculated from FAM fluorescence was 38%. (b) The same gel was stained with GelStar. The yield of the secondary SA/DNA complex (the lower band) in lane 2' calculated from GelStar fluorescence was 39%.

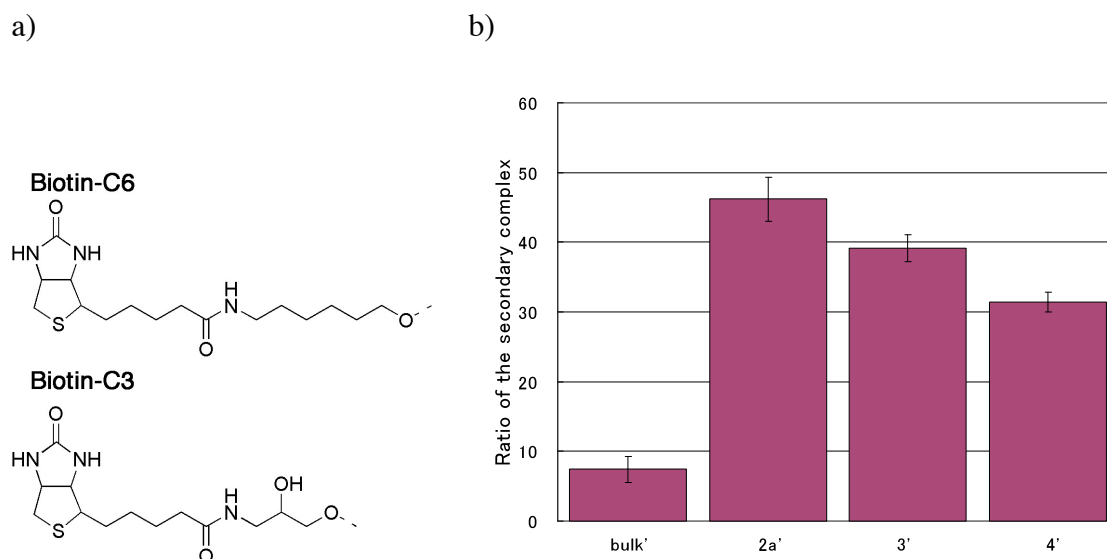

**Figure S5.** Bidentate capture of SA using shorter linkers between biotins and DNA. (a) Structures of the biotin residues with shorter linkers. The 5' end of **13** was modified with a biotin-C6 residue (**13bio'**), similarly the 3' end of **14** was modified with a biotin-C3 residue (**14bio'**). By using these biotinylated strands, **2a'**, **3'** and **4'** was prepared. (b) The yield of the secondary SA/DNA complex formed in **2a'**, **3'**, and **4'** estimated in the same way as Figure 4a. The yield in **2a'**, **3'** and **4'** was  $46 \pm 3\%$ ,  $39 \pm 2\%$  and  $31 \pm 1\%$ , respectively.

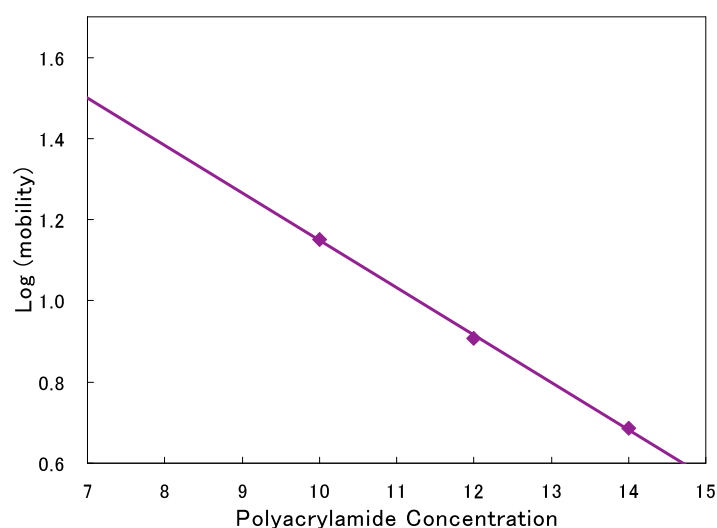

**Figure S6.** The Ferguson plot of the top band in Figure 5. The slope is -0.117 and the intercept is 2.32.

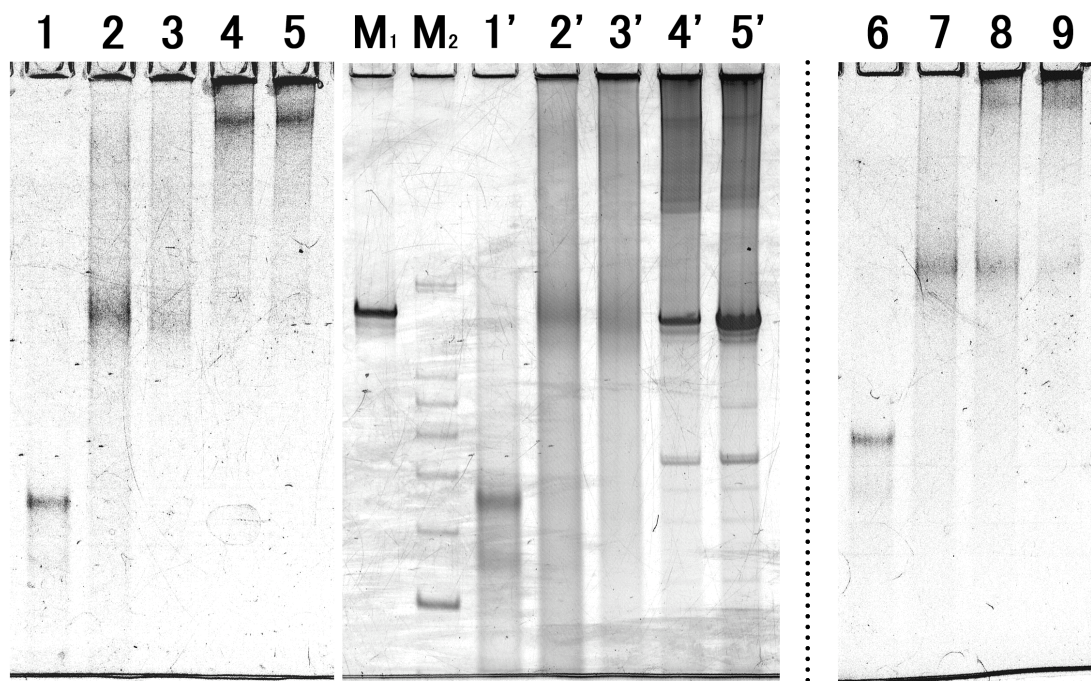

**Figure S7.** Further modification of SA in a well by biotinylated long dsDNA (1272 bp). Lanes 1–5, the same as Figure 6. Lane  $M_1$ , the biotinylated dsDNA; lane  $M_2$ , a 100 bp dsDNA ladder. Lanes 1'–5', lanes 1–5 were stained with GelStar. Lanes 6–9, capture of a SA/dsDNA complex in a well. Preformed complex of SA and the biotinylated dsDNA was added to the solution of **2b** containing FAM-labeled **11bio** and **17bio**. The mixture was analyzed by a 4% non-denaturing PAGE. Lane 6, **1** containing FAM-labeled **11bio** and **17bio**; lane 7, **2b** containing FAM-labeled **11bio** and **17bio**; lanes 8 and 9, SA and a biotinylated dsDNA was mixed first and added to the solution of **2b** containing FAM-labeled **11bio** and **17bio**. Conditions: [DNA motifs] = 33 nM, [SA] = [biotinylated dsDNA] = 33 (lane3), 67 nM (lane 4)
